# Supplementary material
Source: PubMed Central journal article supplement (PMC5904319)
Supplement: rspb20180205supp2.pdf [file rspb20180205supp2.pdf]

Do priority effects outweigh environmental filtering in a guild of dominant freshwater macroinvertebrates? DOI: 10.1098/rspb.2018.0205

### Appendix II – Coexistence of Amphipod species at sampling points

**Table S2.** For the subset of sampling points where multiple amphipod species ever coexisted, the estimated total abundance of amphipods and the relative proportion of different species present at each of four sampling visits from 2015-2016.

| Point  | Sampling Bout | Minimum number of amphipods present | Proportion <i>G. pulex</i> | Proportion <i>G. fossarum</i> | Proportion <i>G. roeseli</i> |
|--------|---------------|-------------------------------------|----------------------------|-------------------------------|------------------------------|
| CHES-1 | 1             | 10                                  | 0.00                       | 1.00                          | 0.00                         |
| CHES-1 | 2             | 100                                 | 0.00                       | 0.96                          | 0.04                         |
| CHES-1 | 3             | 10                                  | 0.00                       | 0.85                          | 0.15                         |
| CHES-1 | 4             | 10                                  | 0.00                       | 0.94                          | 0.06                         |
| HEP-6  | 1             | 1                                   | 0.80                       | 0.20                          | 0.00                         |
| HEP-6  | 2             | 10                                  | 1.00                       | 0.00                          | 0.00                         |
| HEP-6  | 3             | 0                                   | -                          | -                             | -                            |
| HEP-6  | 4             | 0                                   | -                          | -                             | -                            |
| HEP-7  | 1             | 1                                   | 1.00                       | 0.00                          | 0.00                         |
| HEP-7  | 2             | 10                                  | 0.89                       | 0.00                          | 0.11                         |
| HEP-7  | 3             | 1                                   | 1.00                       | 0.00                          | 0.00                         |
| HEP-7  | 4             | 10                                  | 0.86                       | 0.00                          | 0.14                         |
| HEP-9  | 1             | 1                                   | 0.60                       | 0.40                          | 0.00                         |
| HEP-9  | 2             | 1                                   | 0.00                       | 0.00                          | 1.00                         |
| HEP-9  | 3             | 0                                   | -                          | -                             | -                            |
| HEP-9  | 4             | 0                                   | -                          | -                             | -                            |
| MANN-1 | 1             | 10                                  | 0.00                       | 1.00                          | 0.00                         |
| MANN-1 | 2             | 10                                  | 0.00                       | 0.95                          | 0.05                         |
| MANN-1 | 3             | 100                                 | 0.00                       | 0.91                          | 0.09                         |
| MANN-1 | 4             | 10                                  | 0.00                       | 0.88                          | 0.13                         |
| SEE-1  | 1             | 100                                 | 0.00                       | 1.00                          | 0.00                         |
| SEE-1  | 2             | 100                                 | 0.04                       | 0.00                          | 0.96                         |
| SEE-1  | 3             | 10                                  | 0.09                       | 0.24                          | 0.68                         |
| SEE-1  | 4             | 10                                  | 0.00                       | 0.62                          | 0.38                         |
| SEE-2  | 1             | 10                                  | 0.00                       | 1.00                          | 0.00                         |
| SEE-2  | 2             | 100                                 | 0.00                       | 1.00                          | 0.00                         |
| SEE-2  | 3             | 100                                 | 0.09                       | 0.91                          | 0.00                         |
| SEE-2  | 4             | 100                                 | 0.00                       | 1.00                          | 0.00                         |
| SEE-3  | 1             | 1000                                | 0.00                       | 1.00                          | 0.00                         |
| SEE-3  | 2             | 100                                 | 0.09                       | 0.91                          | 0.00                         |
| SEE-3  | 3             | 100                                 | 0.00                       | 1.00                          | 0.00                         |
| SEE-3  | 4             | 10                                  | 0.00                       | 1.00                          | 0.00                         |

Do priority effects outweigh environmental filtering in a guild of dominant freshwater macroinvertebrates? DOI: 10.1098/rspb.2018.0205

| Point  | Sampling Bout | Minimum number of amphipods present | Proportion <i>G. pulex</i> | Proportion <i>G. fossarum</i> | Proportion <i>G. roeseli</i> |
|--------|---------------|-------------------------------------|----------------------------|-------------------------------|------------------------------|
| SEE-4  | 1             | 100                                 | 0.00                       | 1.00                          | 0.00                         |
| SEE-4  | 2             | 10                                  | 0.00                       | 1.00                          | 0.00                         |
| SEE-4  | 3             | 10                                  | 0.06                       | 0.94                          | 0.00                         |
| SEE-4  | 4             | 1                                   | 0.00                       | 1.00                          | 0.00                         |
| SEE-5  | 1             | 100                                 | 0.45                       | 0.55                          | 0.00                         |
| SEE-5  | 2             | 10                                  | 0.40                       | 0.60                          | 0.00                         |
| SEE-5  | 3             | 10                                  | 0.63                       | 0.38                          | 0.00                         |
| SEE-5  | 4             | 10                                  | 0.17                       | 0.83                          | 0.00                         |
| SEE-6  | 1             | 100                                 | 0.76                       | 0.24                          | 0.00                         |
| SEE-6  | 2             | 10                                  | 0.81                       | 0.19                          | 0.00                         |
| SEE-6  | 3             | 1                                   | 0.33                       | 0.67                          | 0.00                         |
| SEE-6  | 4             | 10                                  | 0.72                       | 0.28                          | 0.00                         |
| SEE-7  | 1             | 1                                   | 1.00                       | 0.00                          | 0.00                         |
| SEE-7  | 2             | 100                                 | 0.43                       | 0.57                          | 0.00                         |
| SEE-7  | 3             | 10                                  | 0.83                       | 0.17                          | 0.00                         |
| SEE-7  | 4             | 100                                 | 0.92                       | 0.08                          | 0.00                         |
| SEE-8  | 1             | 1                                   | 1.00                       | 0.00                          | 0.00                         |
| SEE-8  | 2             | 10                                  | 0.67                       | 0.33                          | 0.00                         |
| SEE-8  | 3             | 100                                 | 1.00                       | 0.00                          | 0.00                         |
| SEE-8  | 4             | 10                                  | 1.00                       | 0.00                          | 0.00                         |
| SEE-9  | 1             | 100                                 | 0.00                       | 1.00                          | 0.00                         |
| SEE-9  | 2             | 100                                 | 0.00                       | 1.00                          | 0.00                         |
| SEE-9  | 3             | 0 (site dry)                        | NA (dry)                   | NA (dry)                      | NA (dry)                     |
| SEE-9  | 4             | 100                                 | 0.06                       | 0.94                          | 0.00                         |
| TOBL-1 | 1             | 10                                  | 0.18                       | 0.47                          | 0.35                         |
| TOBL-1 | 2             | 1000                                | 1.00                       | 0.00                          | 0.00                         |
| TOBL-1 | 3             | 10                                  | 0.53                       | 0.47                          | 0.00                         |
| TOBL-1 | 4             | 10                                  | 0.55                       | 0.20                          | 0.25                         |
| TOBL-2 | 1             | 10                                  | 0.87                       | 0.13                          | 0.00                         |
| TOBL-2 | 2             | 100                                 | 1.00                       | 0.00                          | 0.00                         |
| TOBL-2 | 3             | 0                                   | -                          | -                             | -                            |
| TOBL-2 | 4             | 10                                  | 1.00                       | 0.00                          | 0.00                         |
